# Supplementary material for: Cucurbit[n]uril-based host-guest interaction enhancing organic room-temperature phosphorescence of phthalic anhydride derivatives in aqueous solution
Source: Royal Society of Chemistry journal article supplement (doi:10.1039/d2nj01507b), 2022-01-01
Supplement: d2nj01507b1.pdf [file d2nj01507b1.pdf]

## Supporting Information

### Cucurbit[*n*]urils-based host-guest interaction enhancing organic room-temperature phosphorescence of phthalic anhydride derivatives in aqueous solution

Tianyue Xu,<sup>a</sup> Fengbo Liu,<sup>a</sup> Xianchen Hu,<sup>a</sup> Zhiyong Zhao,<sup>a,b</sup> Simin Liu<sup>\*a,b</sup>

<sup>a</sup> School of Chemistry and Chemical Engineering, Wuhan University of Science and Technology, Wuhan 430081, China. E-mail: [liusimin@wust.edu.cn](mailto:liusimin@wust.edu.cn)

<sup>b</sup> The State Key Laboratory of Refractories and Metallurgy, Institute of Advanced Materials and Nanotechnology, Wuhan University of Science and Technology, Wuhan 430081, China.

| Table of Contents                                                                                                                                                | Page    |
|------------------------------------------------------------------------------------------------------------------------------------------------------------------|---------|
| General experimental section .....                                                                                                                               | S2      |
| .....                                                                                                                                                            |         |
| Synthesis of <b>G1-G3</b> guest molecules .....                                                                                                                  | S3-S4   |
| .....                                                                                                                                                            |         |
| <sup>1</sup> H NMR spectra of <b>G2</b> with addition of CB[8],<br>ESI-MS of complexation of <b>G2</b> with CB[8, 10],<br>ITC data of <b>G2</b> with CB[8] ..... | S5-S6   |
| .....                                                                                                                                                            |         |
| <sup>1</sup> H NMR titration of <b>G1</b> with CB[8, 10], ITC data<br>of <b>G1</b> with CB[8] .....                                                              | S7-S8   |
| .....                                                                                                                                                            |         |
| <sup>1</sup> H NMR spectra of <b>G3</b> with addition of CB[8, 10],<br>ITC data of <b>G3</b> with CB[8] .....                                                    | S8-S10  |
| .....                                                                                                                                                            |         |
| Photophysical properties spectra of <b>G1-G2</b> and<br>their complexes with addition of CB[8, 10] in water .....                                                | S10-S13 |
| .....                                                                                                                                                            |         |
| Photophysical properties spectra of <b>G3</b> and their<br>complexes with addition of CB[8, 10] .....                                                            | S14-S15 |
| .....                                                                                                                                                            |         |
| UV-Vis spectra of <b>G1-G3</b> and their complexes with<br>CB[8, 10] in water .....                                                                              | S15-S18 |
| .....                                                                                                                                                            |         |
| <sup>1</sup> H and <sup>13</sup> C NMR spectra of <b>G1-G3</b> .....                                                                                             | S18-S24 |
| .....                                                                                                                                                            |         |
| References                                                                                                                                                       | S24     |

### **General Experimental Section.**

CB[8] and CB[10] were prepared by the corresponding literature procedures.<sup>1,2</sup> Other compounds used in this study were purchased from commercial suppliers and were used without further purification. NMR spectra (<sup>1</sup>H, <sup>13</sup>C) were collected on Agilent 600 MHz DD2 spectrometers. Mass spectrometry was performed using a Bruker FT-ICR Apex IV qQ equipped 12T super conducting magnet. UV/Vis were performed on a SHIMADZU UV-3600 instrument with 1 cm pathlength cells at 298 K. ITC data was measured using TA NANO ITC instrument. Photoluminescence spectra were measured on a PerkinElmer LS-55 machine. Phosphorescence lifetime was recorded using a FS5 instrument (Edinburg instruments, Livingstone, UK). A Suprasil Quartz (QS) cuvette with 1 cm path length was used for all measurements. The data was fitted with the exponential reconvolution function and the non-linear least square method.

## Synthesis and characterization

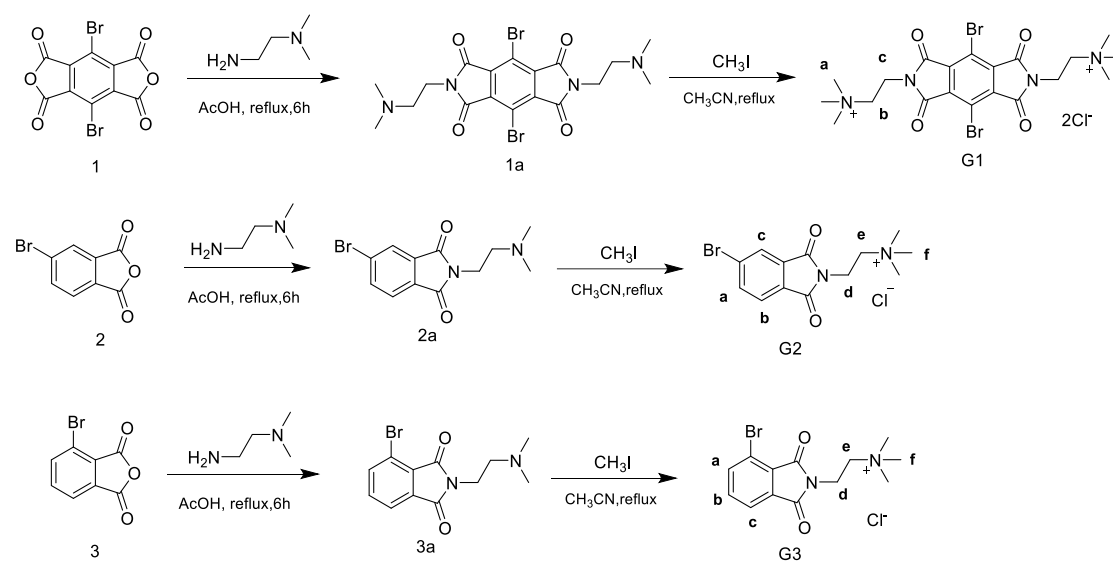

**Scheme S1.** Synthesis route of phtalic anhydride derivatives **G1-G3**.

Synthesis of **G1-G3** were modified from previously reported procedures.<sup>3,4</sup>

*4,8-dibromo-2,6-bis(2-(dimethylamino)ethyl)pyrrolo[3,4-f]isoindole-1,3,5,7(2H,6H)-tetraone (1a)*  
Compound **1** (0.187 g, 0.5 mmol) and 2-dimethylaminoethylamine (0.176 g, 2 mmol) were added in acetic acid (30 ml), the mixture was refluxed for 6 h in oil bath. The resultant solution was extracted with dichloromethane, and then organic phase was evaporated under reduced pressure and then purified by silicagel column chromatography (dichloromethane/methanol=50:1) to afford **1a** (73 mg, 28%) as pink solid. <sup>1</sup>H NMR (600 MHz, CDCl<sub>3</sub>) δ (ppm): 3.84 (t, *J* = 6.0 Hz, 2H), 2.60 (t, *J* = 6.6 Hz, 2H), 2.26 (s, 6H).

*5-bromo-2-(2-(dimethylamino)ethyl)isoindoline-1,3-dione (2a)*

Compound **2** (0.226 g, 1 mmol) and 2-dimethylaminoethylamine (0.176 g, 2 mmol) were added in acetic acid (30 ml), the mixture was refluxed for 6 h in oil bath. The resultant solution was extracted with dichloromethane, and then organic phase was evaporated under reduced pressure and then purified by silicagel column chromatography (dichloromethane/methanol=50:1) to afford **2a** (172 mg, 58%) as yellow solid. <sup>1</sup>H NMR (600 MHz, DMSO-*d*<sub>6</sub>) δ (ppm): 8.04 (s, 1H), 8.01 (d, *J* = 7.8 Hz, 1H), 7.78 (d, *J* = 8.4 Hz, 1H), 3.64 (t, *J* = 6.6 Hz, 2H), 2.44 (t, *J* = 6.6 Hz, 2H), 2.12 (s, 6H).

*4-bromo-2-(2-(dimethylamino)ethyl)isoindoline-1,3-dione (3a)*

Compound **3** (0.226 g, 1 mmol) and 2-dimethylaminoethylamine (0.176 g, 2 mmol) were added in acetic acid (40 ml), the mixture was refluxed for 6 h in oil bath. The resultant solution was extracted with dichloromethane, and the organic phase was evaporated under reduced pressure and then purified by silicagel column chromatography (dichloromethane/methanol=50:1) to afford **3a**

(146 mg, 49%) as white solid.  $^1\text{H}$  NMR (600 MHz,  $\text{CDCl}_3$ )  $\delta$  (ppm): 7.98 (d,  $J = 2.4$  Hz, 1H), 7.85 (d,  $J = 7.8$  Hz, 1H), 7.71 (d,  $J = 8.4$  Hz, 1H), 4.01 (t,  $J = 7.8$  Hz, 2H), 3.15 (t,  $J = 6.6$  Hz, 2H), 2.71 (s, 6H).

*2,2'-(4,8-dibromo-1,3,5,7-tetraoxo-5,7-dihydropyrrolo[3,4-f]isoindole-2,6(1H,3H)-diyl)bis(N,N,N-trimethylethan-1-aminium)* (**G1**)

To a solution of DCM (30 ml) was added compound **1a** (51 mg, 0.1 mmol), methyl iodide (1 ml) was then added, the mixture was refluxed for 24 h in oil bath. The resultant solution was cooled to room temperature and evaporated under reduced pressure, the residue was washed by DCM for three times and dried at 60 °C in vacuum. The solid was dissolved in  $\text{H}_2\text{O}$ , added  $\text{KPF}_6$  and the precipitate was centrifuged, washed by  $\text{H}_2\text{O}$  for three times. The solid was dissolved in  $\text{CH}_3\text{CN}$  and  $\text{Bu}_4\text{N}^+\text{Cl}^-$  was added, the precipitate was washed by  $\text{CH}_3\text{CN}$  for three times to afford **G1** (31 mg, 51%) as pink-white solid.  $^1\text{H}$  NMR (600 MHz,  $\text{D}_2\text{O}$ )  $\delta$  (ppm): 4.12 (t,  $J = 7.2$  Hz, 2H), 3.56 (t,  $J = 6.6$  Hz, 2H), 3.14 (s, 9H).  $^{13}\text{C}$  NMR (151 MHz,  $\text{D}_2\text{O}$ )  $\delta$  (ppm): 164.4, 136.3, 109.9, 62.0, 53.3, 32.2. HRMS (ESI):  $m/z$   $[\text{M}-2\text{Cl}]^{2+}$  calcd. for  $\text{C}_{20}\text{H}_{26}\text{Br}_2\text{N}_4\text{O}_4^{2+}$ : 272.0159, found: 272.0154.

Products **G2** and **G3** were synthesized via the same procedures as **G1**.

*2-(5-bromo-1,3-dioxoisindolin-2-yl)-N,N,N-trimethylethan-1-aminium chloride* (**G2**)

Faint yellow solid (89 mg, 63%).  $^1\text{H}$  NMR (600 MHz,  $\text{D}_2\text{O}$ )  $\delta$  (ppm): 7.97 (s, 1H), 7.91 (d,  $J = 7.8$  Hz, 1H), 7.68 (d,  $J = 8.4$  Hz, 1H), 4.05 (t,  $J = 7.2$  Hz, 2H), 3.54 (t,  $J = 6.6$  Hz, 2H), 3.11 (s, 9H).  $^{13}\text{C}$  NMR (151 MHz,  $\text{D}_2\text{O}$ )  $\delta$  (ppm): 168.8, 168.2, 137.8, 132.9, 129.9, 129.1, 126.8, 125.0, 62.4, 53.2, 31.8. HRMS (ESI):  $m/z$   $[\text{M}-2\text{Cl}]^{1+}$  calcd. for  $\text{C}_{13}\text{H}_{16}\text{BrN}_2\text{O}_2^{1+}$ : 311.0389, found: 311.0389.

*2-(4-bromo-1,3-dioxoisindolin-2-yl)-N,N,N-trimethylethan-1-aminium chloride* (**G3**)

White solid (92 mg, 65%).  $^1\text{H}$  NMR (600 MHz,  $\text{D}_2\text{O}$ )  $\delta$  (ppm): 7.84 (d,  $J = 8.4$  Hz, 1H), 7.75 (d,  $J = 7.8$  Hz, 1H), 7.57 (t,  $J = 7.8$  Hz, 1H), 4.07 (t,  $J = 6.6$  Hz, 2H), 3.56 (t,  $J = 7.2$  Hz, 2H), 3.13 (s, 9H).  $^{13}\text{C}$  NMR (151 MHz,  $\text{D}_2\text{O}$ )  $\delta$  (ppm): 167.9, 167.6, 139.4, 135.9, 133.4, 128.9, 122.9, 118.1, 62.4, 53.3, 31.8. HRMS (ESI):  $m/z$   $[\text{M}-2\text{Cl}]^{1+}$  calcd. for  $\text{C}_{13}\text{H}_{16}\text{BrN}_2\text{O}_2^{1+}$ : 311.0389, found: 311.0389.

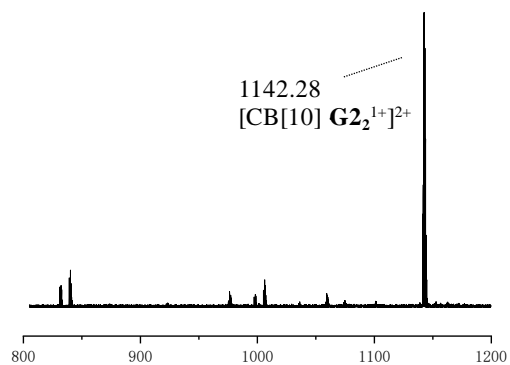

**Figure S1.** ESI-MS spectral of compound **G2** with 1 equiv. of CB[10]. The ion at  $m/z = 1142.28$  which corresponds to the 1:2 complex CB[10] **2G2** ( $[CB[10] + 2G2^{1+}]^{2+} = 1142.29$ ) was observed.

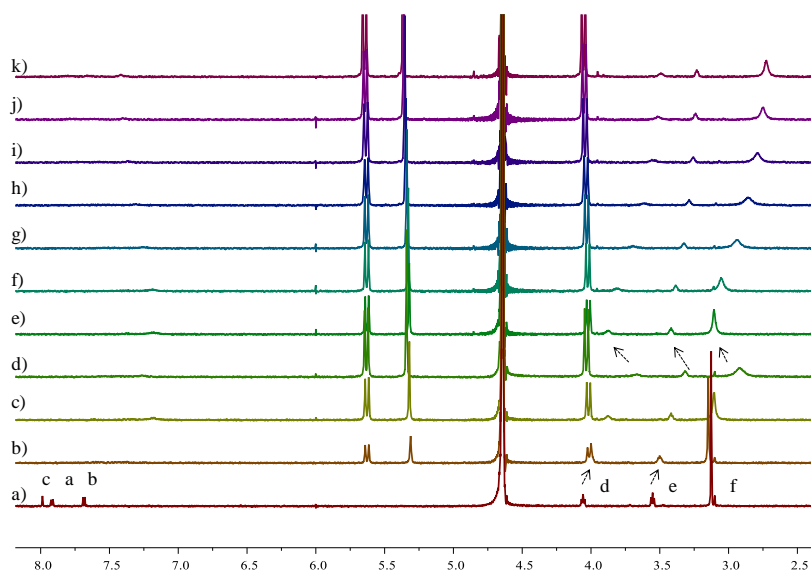

**Figure S2.**  $^1\text{H}$  NMR spectra recorded(600 MHz,  $\text{D}_2\text{O}$ , 298K) for compound **G2** (1.0 mM) with addition of different equivalences of CB[8]: (a) 0, (b) 0.1, (c) 0.2, (d) 0.3, (e) 0.4, (f) 0.5, (g) 0.6, (h) 0.7, (i) 0.8, (j) 0.9, (k) 1.0.

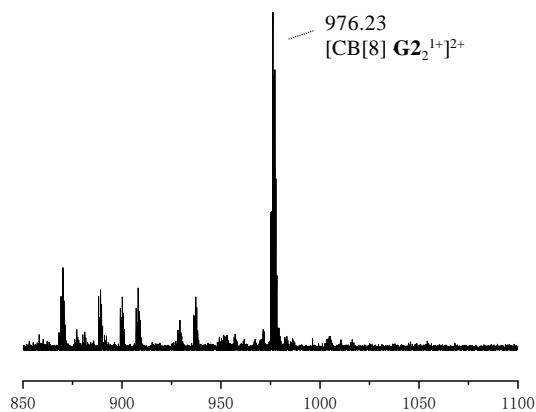

**Figure S3.** ESI-MS spectral of compound **G2** with 1 equiv. of CB[8]. The ion at  $m/z = 976.23$  which corresponds to the 1:2 complex CB[8] 2G2 ( $[CB[8] + 2G2^{1+}]^{2+} = 976.23$ ) was observed.

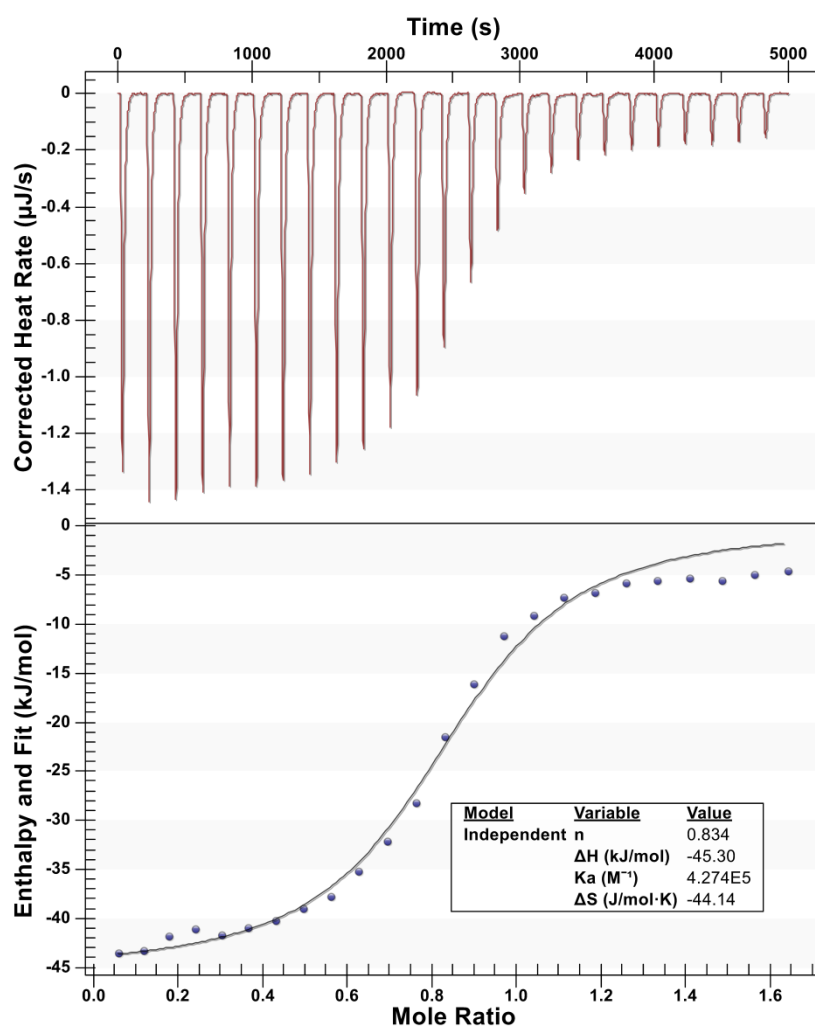

**Figure S4.** The ITC data for **G2** with CB[8] in water.

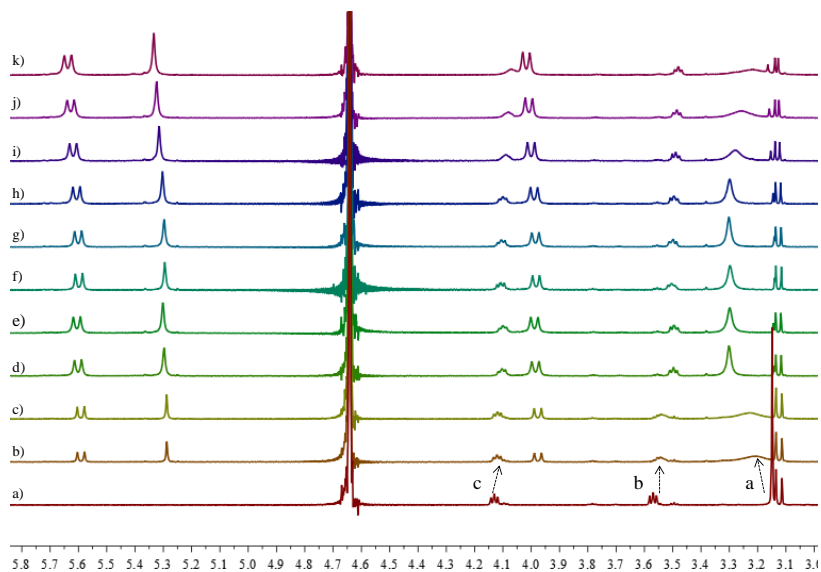

**Figure S5.**  $^1\text{H}$  NMR spectra recorded (600 MHz,  $\text{D}_2\text{O}$ , 298K) for compound **G1** (1.0 mM) upon titration of different amounts of CB[10]: (a) 0, (b) 0.1, (c) 0.2, (d) 0.3, (e) 0.4, (f) 0.5, (g) 0.6, (h) 0.7, (i) 0.8, (j) 0.9, (k) 1.0 equiv.

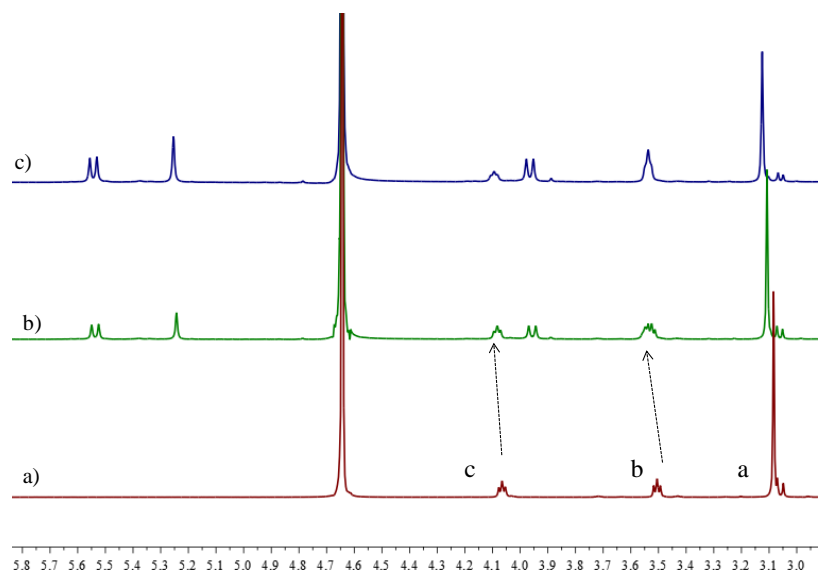

**Figure S6.**  $^1\text{H}$  NMR spectra recorded (600 MHz,  $\text{D}_2\text{O}$ , 298K) for compound **G1** (1.0 mM) with addition of different equivalents of CB[8] (a) 0, (b) 0.5, (c) 1.0.

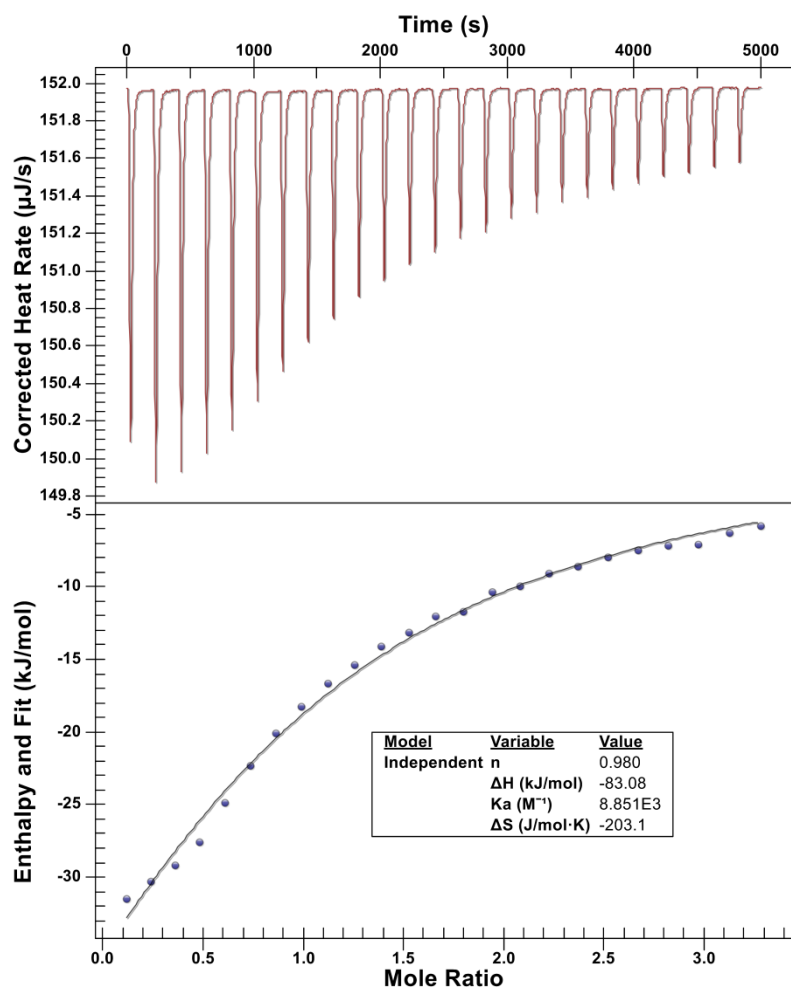

**Figure S7.** The ITC data of **G1** with CB[8] in water.

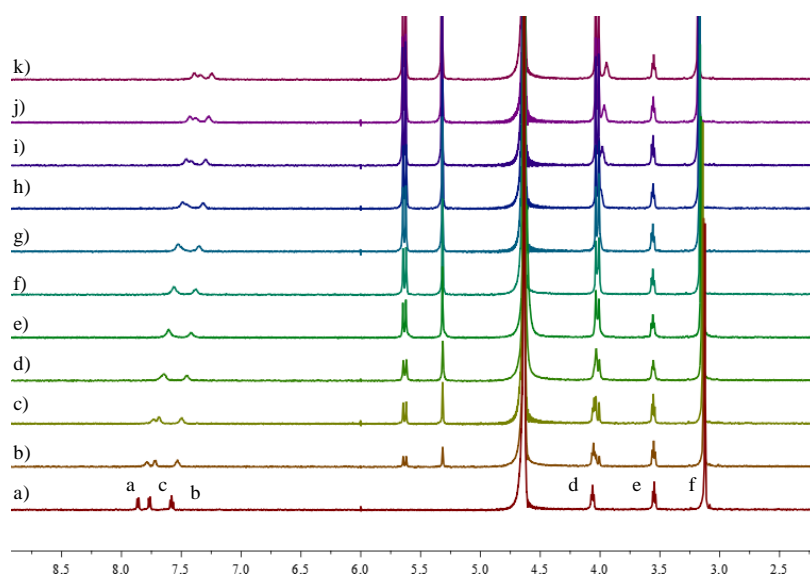

**Figure S8.**  $^1H$  NMR spectra recorded (600 MHz,  $D_2O$ , 298K) for compound **G3** (1.0 mM) with addition of different equivalences of CB[8]: (a) 0, (b) 0.1, (c) 0.2, (d) 0.3, (e) 0.4, (f) 0.5, (g) 0.6, (h) 0.7, (i) 0.8, (j) 0.9, (k) 1.0.



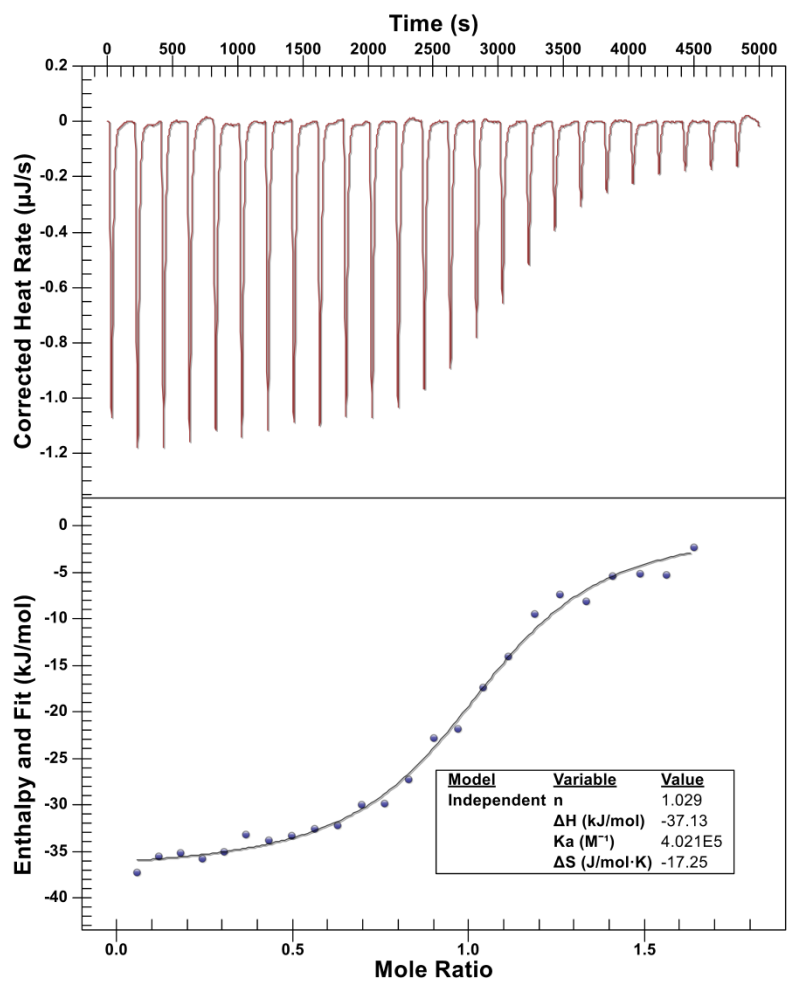

Figure S9. The ITC data of G3 with CB[8] in water.

Table S1. Binding constants of G1-G3 with CB[8].

| Guest | Host  | Binding constant ( $M^{-1}$ ) |
|-------|-------|-------------------------------|
| G1    | CB[8] | $8.85 \times 10^3$            |
| G2    | CB[8] | $4.27 \times 10^5$            |
| G3    | CB[8] | $4.02 \times 10^5$            |

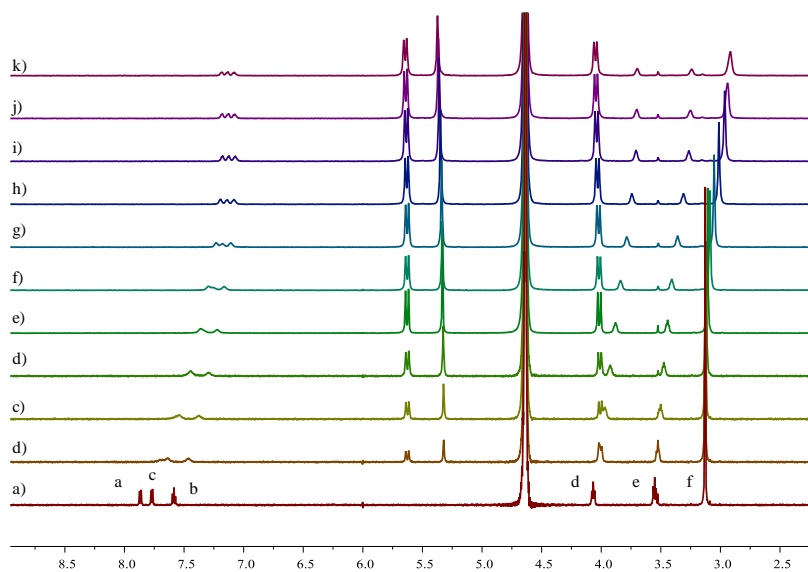

**Figure S10.**  $^1\text{H}$  NMR spectra recorded (600 MHz,  $\text{D}_2\text{O}$ , 298K) for compound **G3** (1.0 mM) with addition of different equivalences of CB[10]: (a) 0, (b) 0.1, (c) 0.2, (d) 0.3, (e) 0.4, (f) 0.5, (g) 0.6, (h) 0.7, (i) 0.8, (j) 0.9, (k) 1.0.

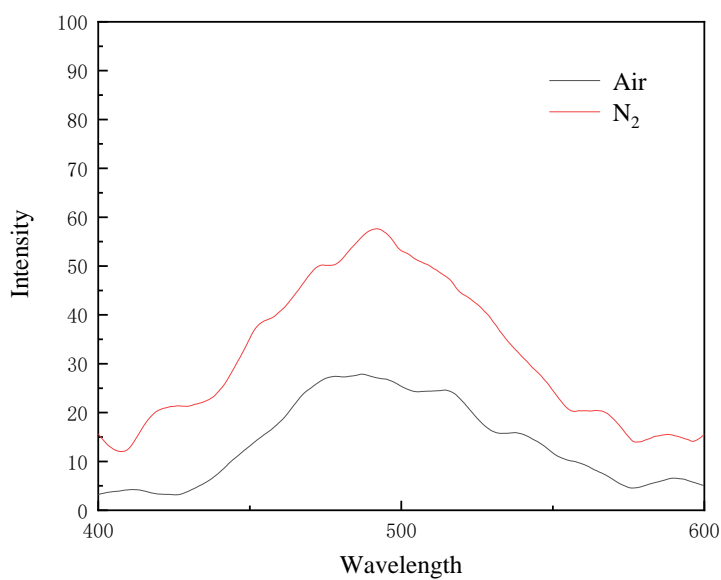

**Figure S11.** Phosphorescence spectra (delayed by 10  $\mu\text{s}$ , slit width:  $e_x = 10$  nm,  $e_m = 5$  nm) of **G1** under air and  $\text{N}_2$  atmosphere.

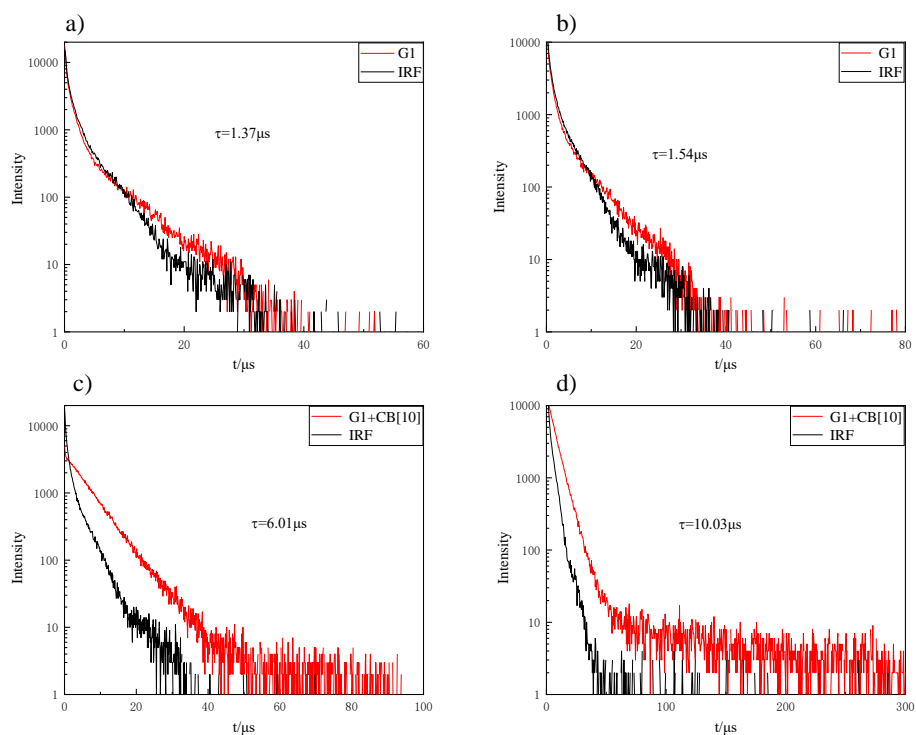

**Figure S12.** Phosphorescence lifetime decay curves of **G1** (a) under ambient condition; (b) under  $N_2$  atmosphere and of **G1** with CB[10] (c) under ambient condition; (d) under  $N_2$  atmosphere.

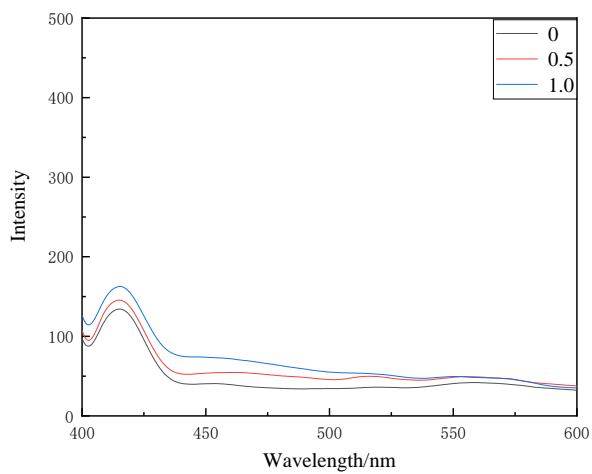

**Figure S13.** Photoluminescence spectra of **G1** ( $50\mu M$ ) with addition of different equiv. of CB[8] in water ( $\lambda_{ex} = 340\text{ nm}$ ; slit width:  $e_x = 10\text{ nm}$ ,  $e_m = 5\text{ nm}$ ).

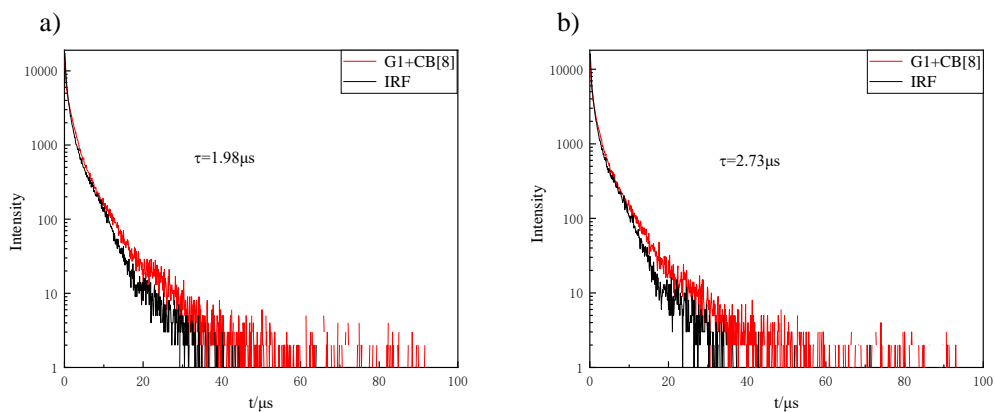

**Figure S14.** Phosphorescence lifetime decay curves of **G1** with CB[8] (a) under ambient condition ; (b) under  $N_2$  atmosphere.

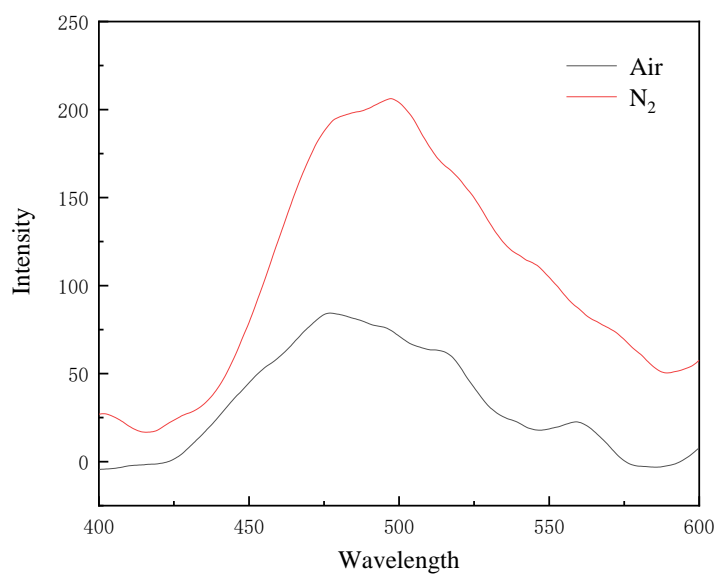

**Figure S15.** Phosphorescence spectra (delayed by 20  $\mu s$ , slit width:  $e_x = 10$  nm,  $e_m = 5$  nm) of **G2** under air and  $N_2$  atmosphere.

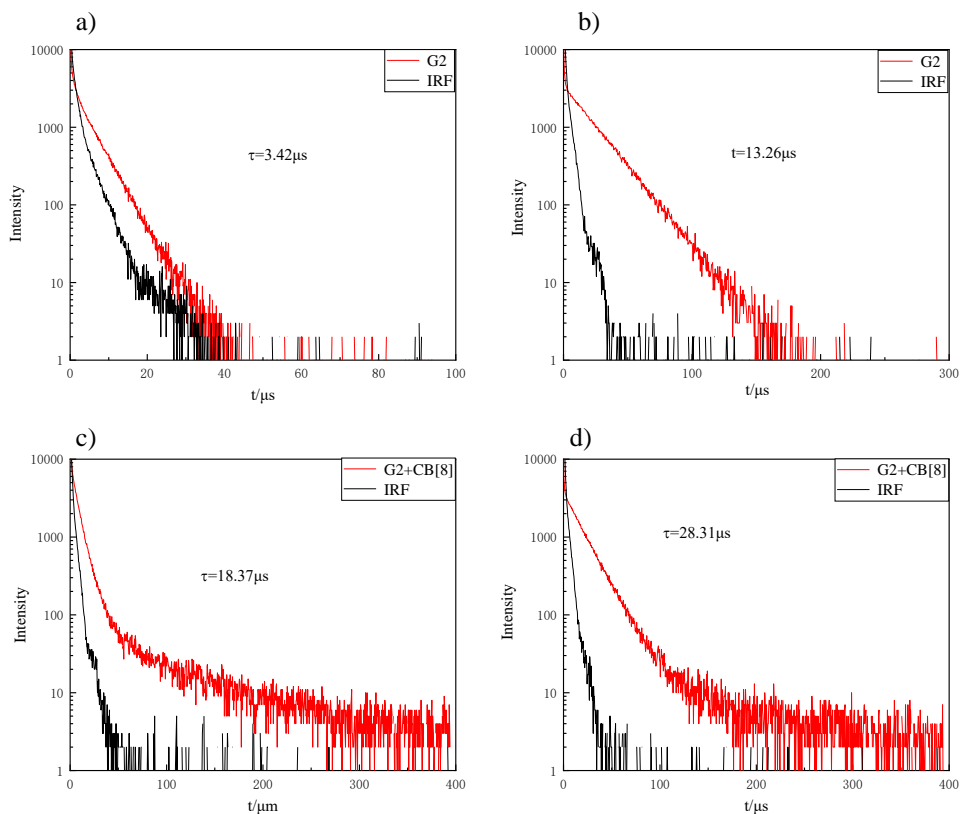

**Figure S16.** Phosphorescence lifetime decay curves of **G2** (a) under ambient condition; (b) under  $N_2$  atmosphere and of **CB[8] G2** complex (c) under ambient condition; (d) under  $N_2$  atmosphere.

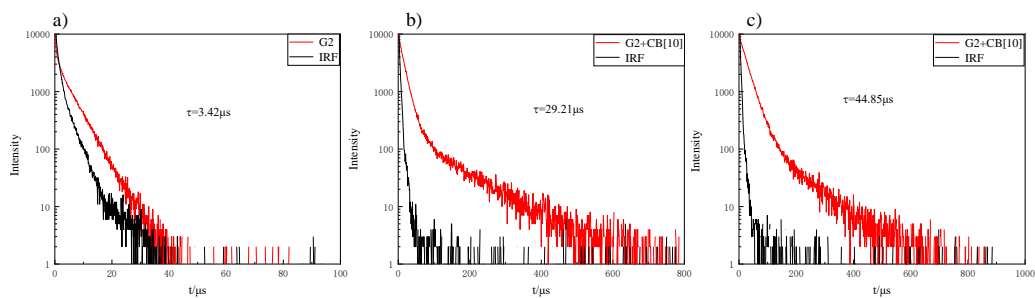

**Figure S17.** Phosphorescence lifetime decay curves of **G2** (a) under ambient condition and of **CB[10] G2** complex (b) under ambient condition; (c) under  $N_2$  atmosphere.

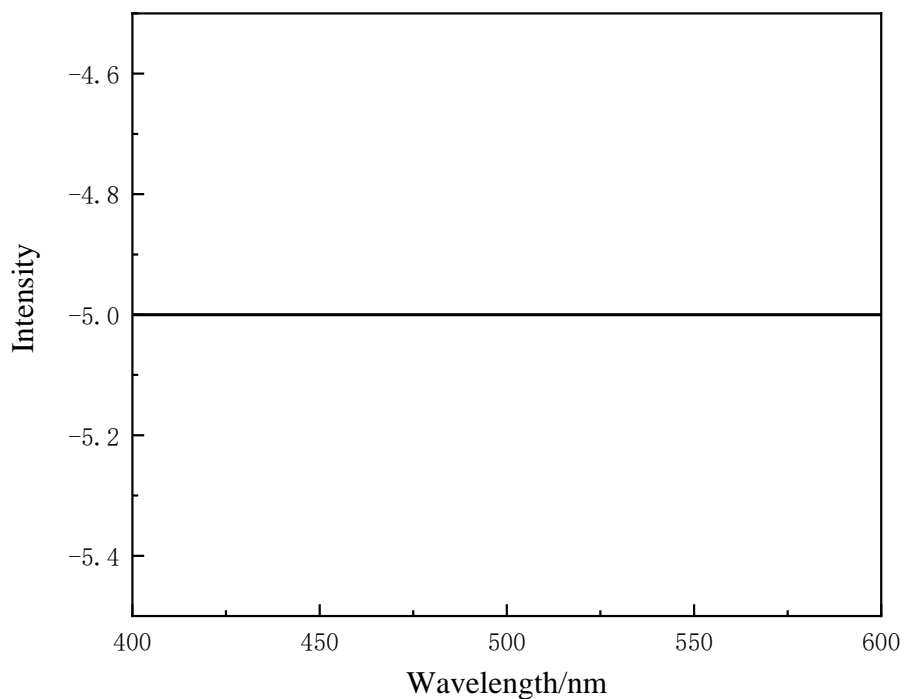

**Figure S18.** Phosphorescence spectra (delayed by 30  $\mu$ s, slit width:  $e_x = 10$  nm,  $e_m = 5$  nm) of **G3** under air and  $N_2$  atmosphere.

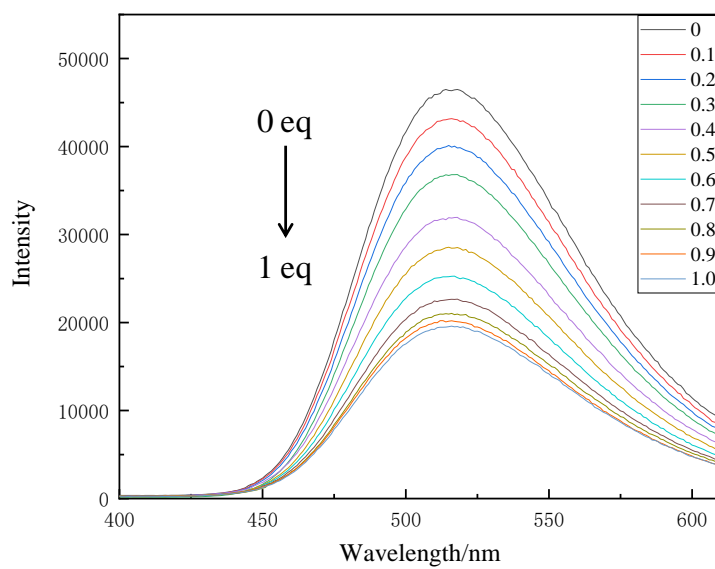

**Figure S19.** Photoluminescence spectra ( $\lambda_{ex} = 319$  nm; slit width:  $e_x = 10$  nm,  $e_m = 5$  nm) of **G3** (50  $\mu$ M) with different equivalences of CB[8] (0 - 1.0 equiv) in water.

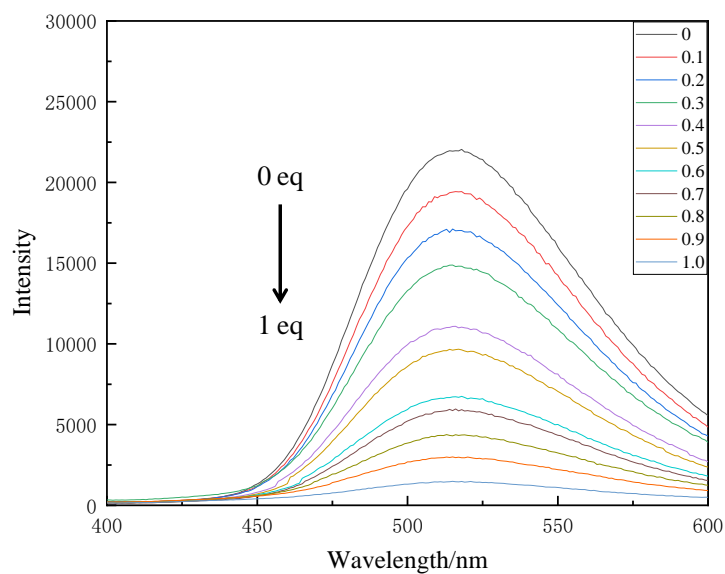

**Figure S20.** Photoluminescence spectra ( $\lambda_{\text{ex}} = 319 \text{ nm}$ ; slit width:  $e_x = 10 \text{ nm}$ ,  $e_m = 5 \text{ nm}$ ) of **G3** ( $50 \mu\text{M}$ ) with different ratios of CB[10] (0 - 1.0 equiv) in water.

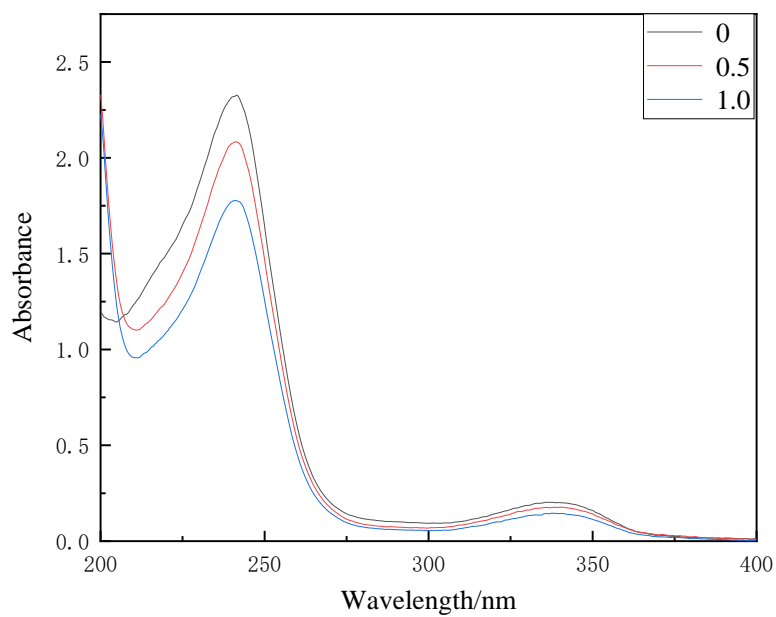

**Figure S21.** UV-Vis absorption spectra of **G1** ( $50 \mu\text{M}$ ) with addition of different equiv. of CB[8].

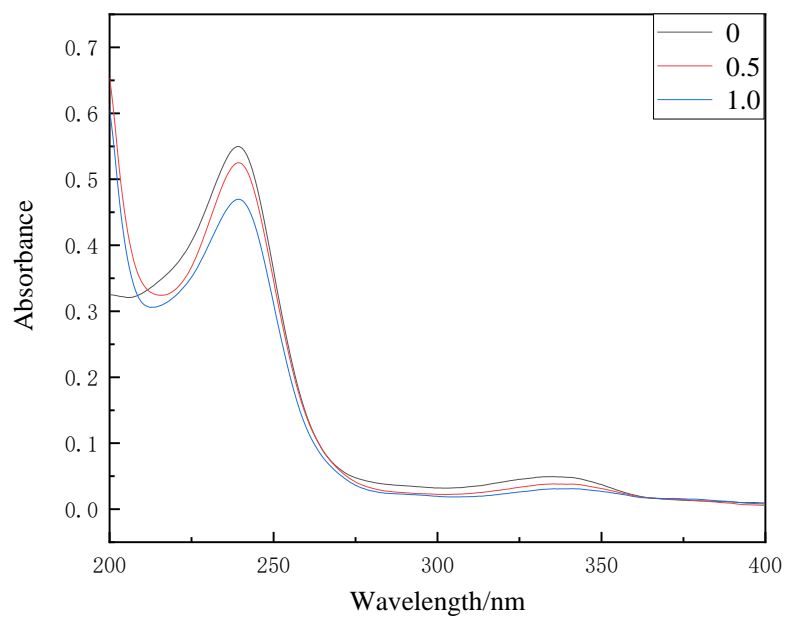

**Figure S22.** UV-Vis absorption spectra of **G1** (50 μM) with addition of different equiv. of CB[10].

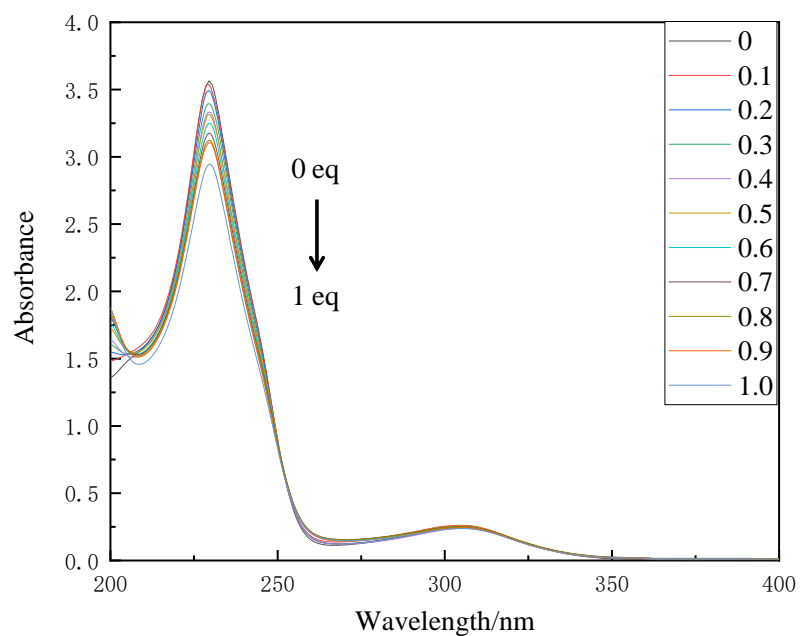

**Figure S23.** UV-Vis absorption spectra of **G2** (50 μM) with addition of different equiv. of CB[8].



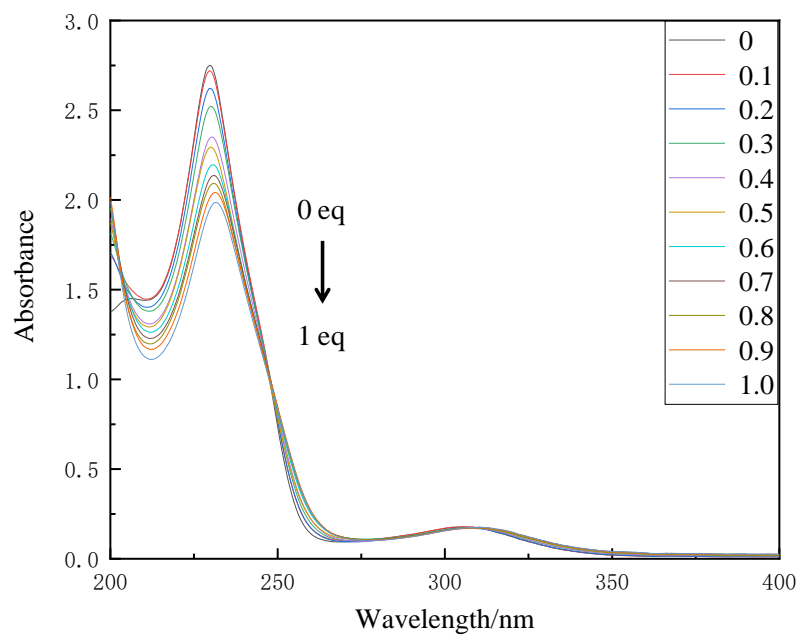

**Figure S24.** UV-Vis absorption spectra of **G2** (50 μM) with addition of different equiv. of CB[10].

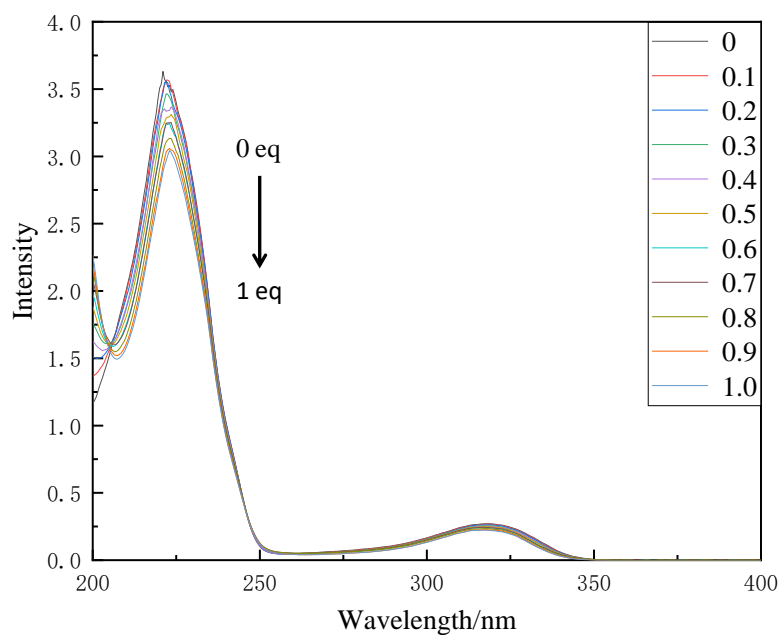

**Figure S25.** UV-Vis absorption spectra of **G3** (50 μM) with addition of different equiv. of CB[8].

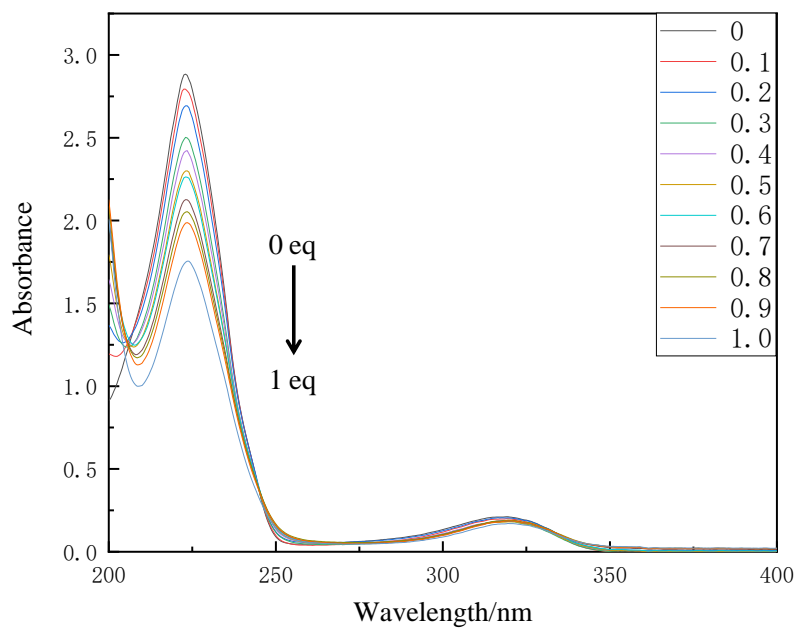

**Figure S26.** UV-Vis absorption spectra of **G3** (50  $\mu$ M) with addition of different equiv. of CB[10].

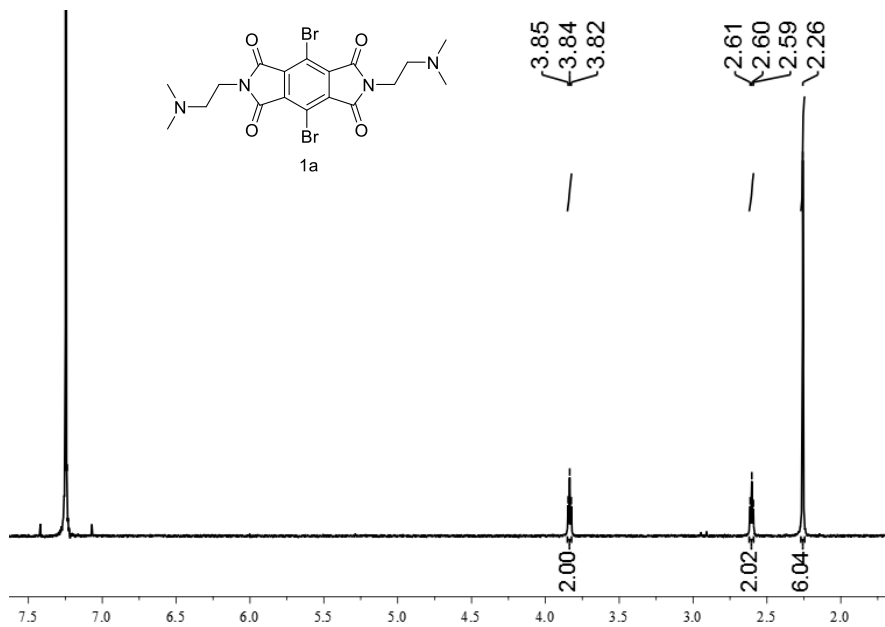

**Figure S27.**  $^1\text{H}$  NMR spectra recorded (600 MHz,  $\text{CDCl}_3$ , 298K) for compound **1a** (1.0 mM) .

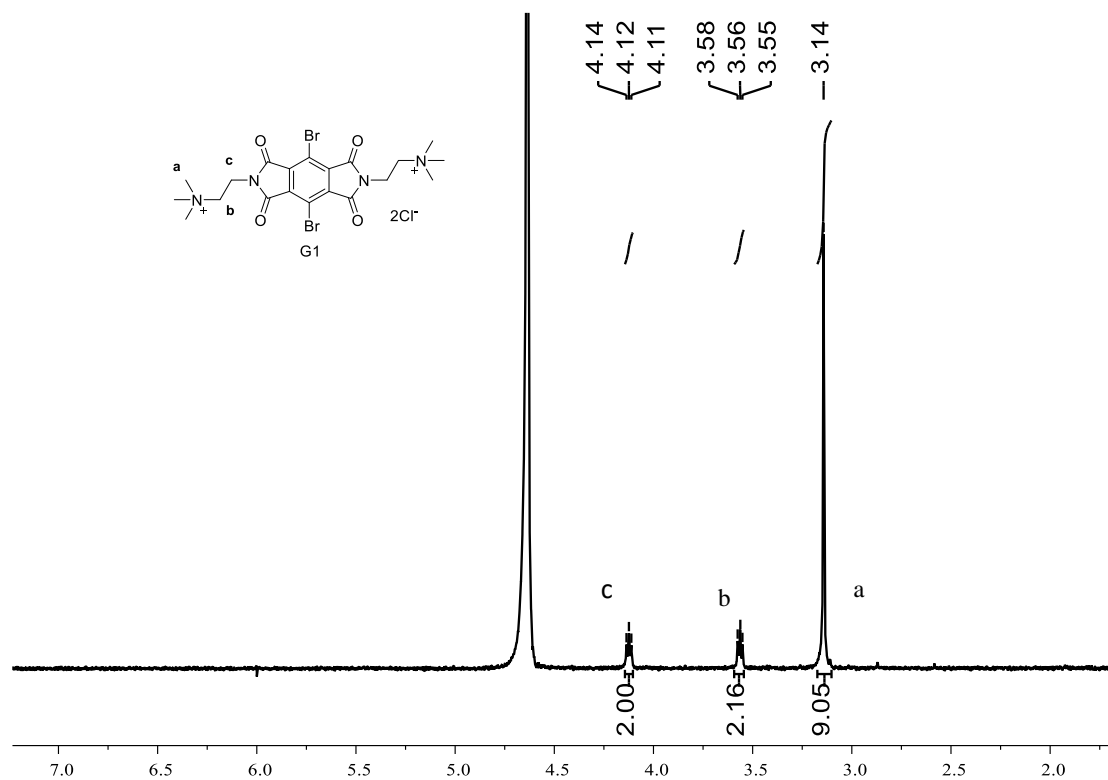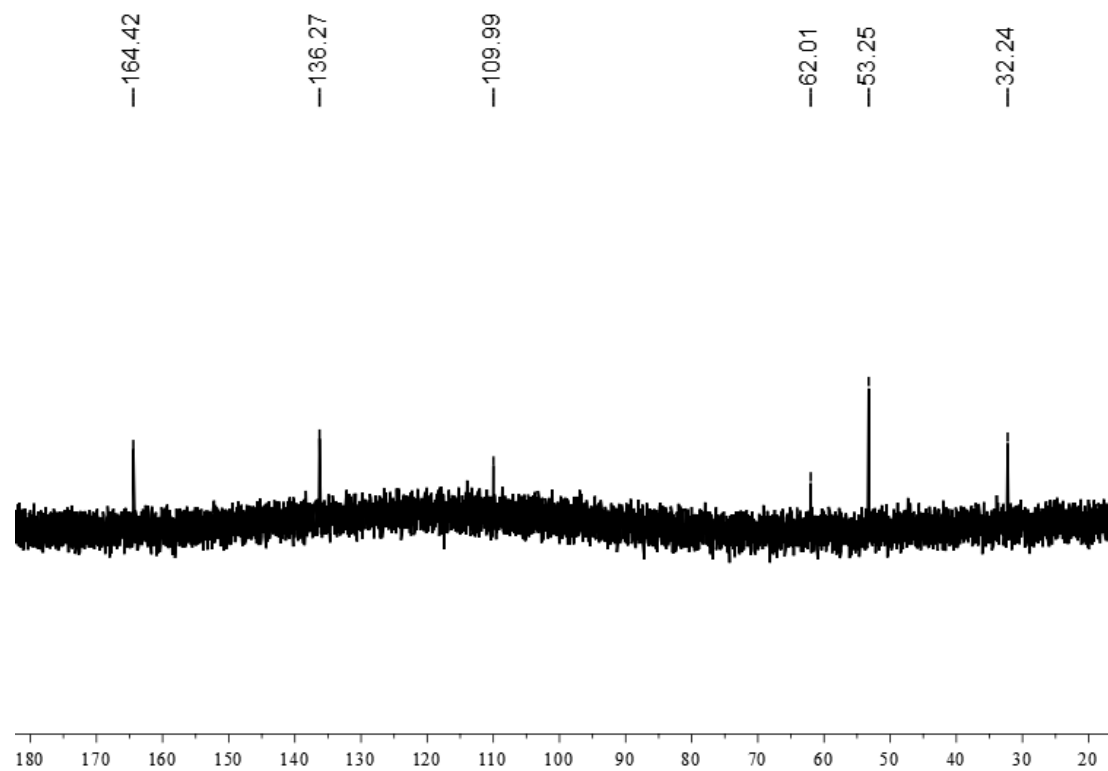

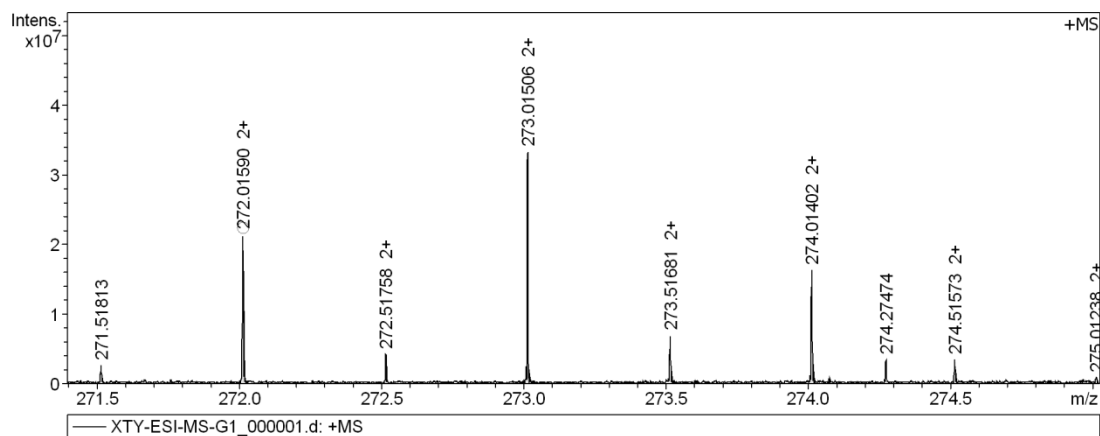

Figure S30. HRMS (ESI) spectrum of G1.

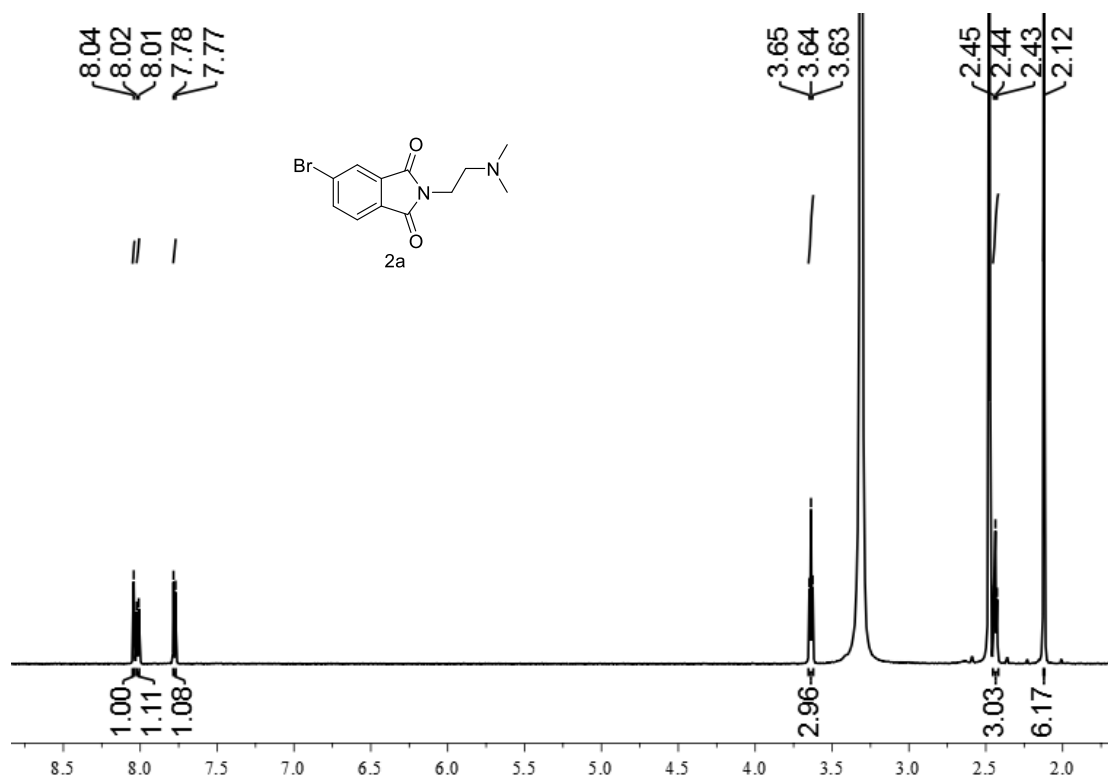

Figure S31. <sup>1</sup>H NMR spectra recorded (600 MHz, DMSO, 298K) for compound 2a (1.0 mM) .

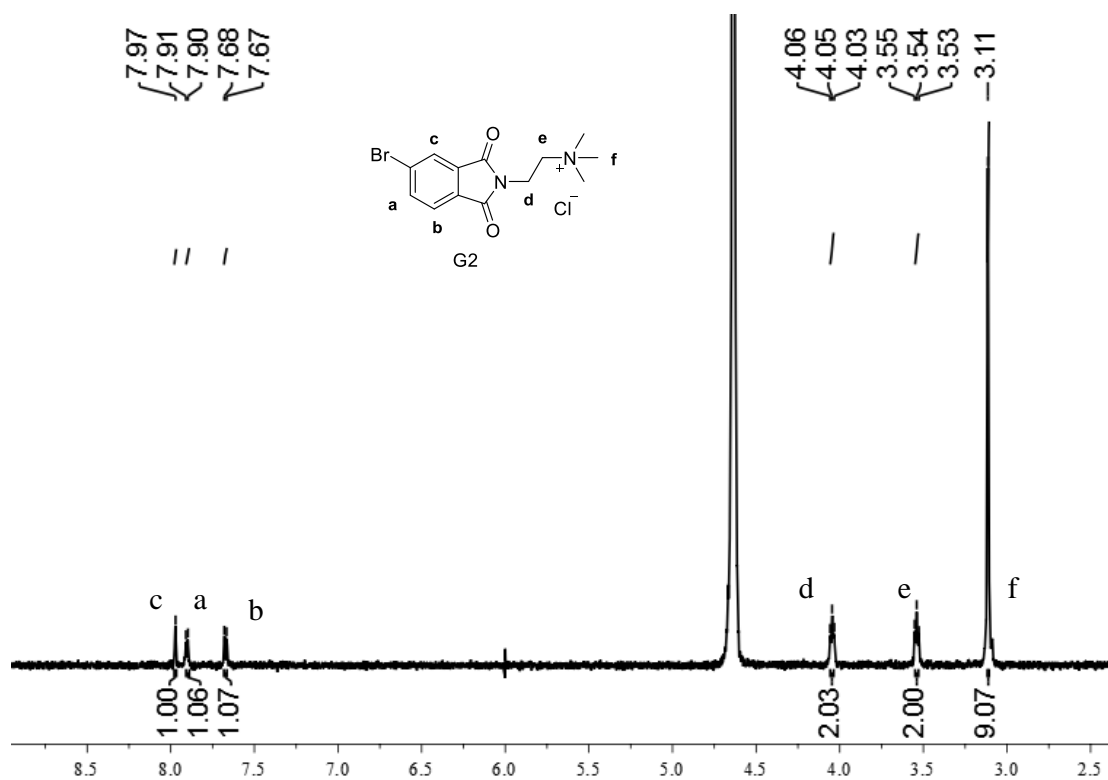

Figure S32. <sup>1</sup>H NMR spectra recorded (600 MHz, D<sub>2</sub>O, 298K) for compound G2 (1.0 mM).

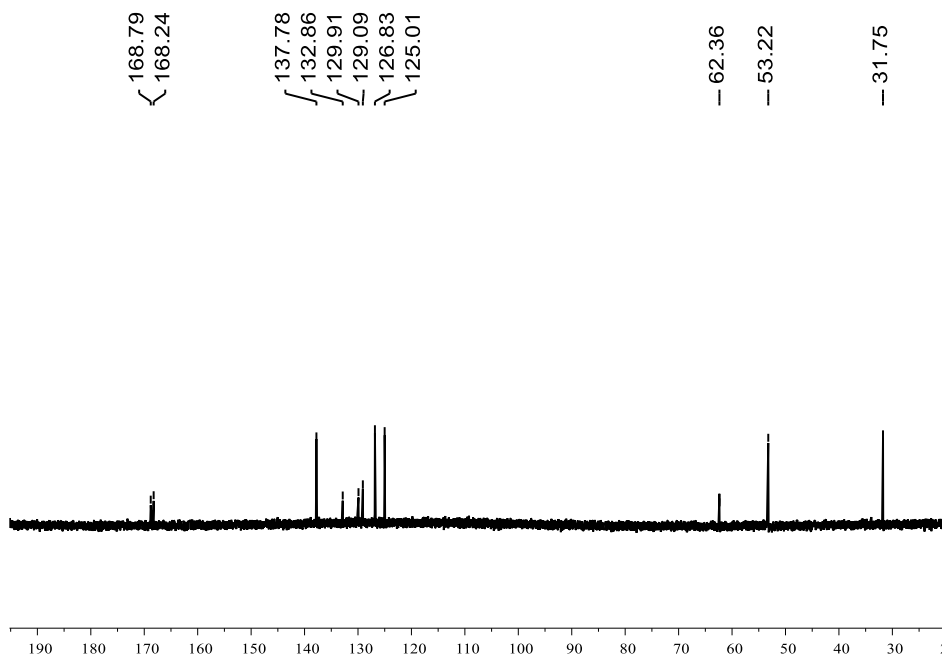

Figure S33. <sup>13</sup>C NMR spectra recorded (600 MHz, D<sub>2</sub>O, 298K) for compound G2 .

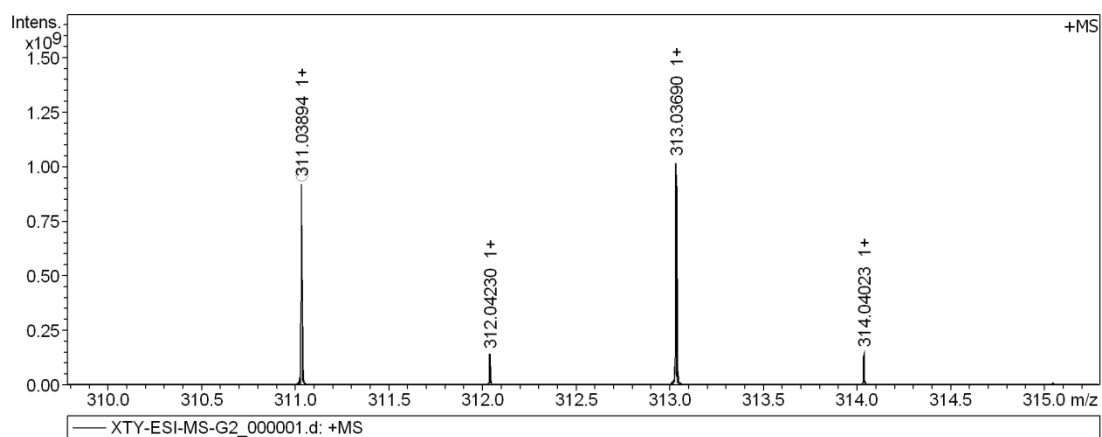

**Figure S34.** HRMS (ESI) spectrum of **G2**.

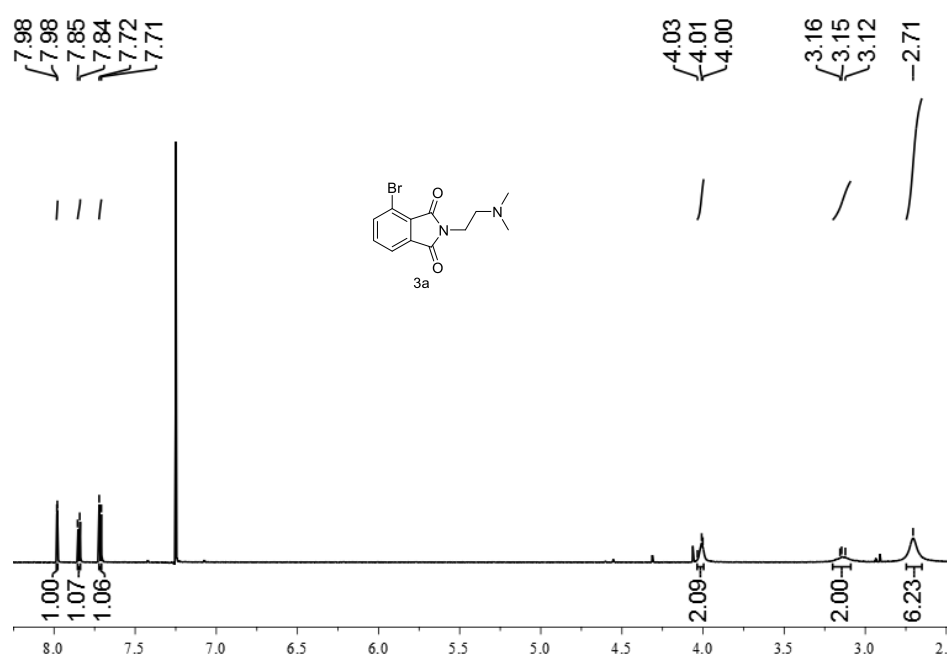

**Figure S35.** <sup>1</sup>H NMR spectra recorded (600 MHz, CDCl<sub>3</sub>, 298K) for compound **3a** (1.0 mM) .

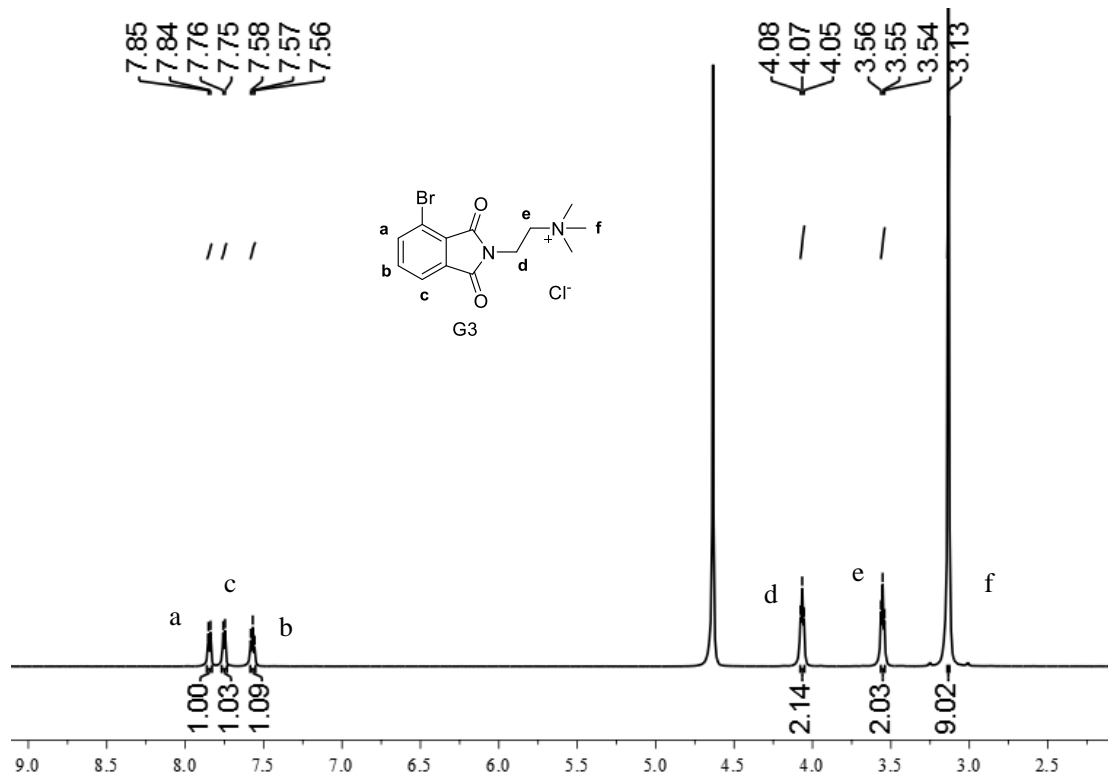

**Figure S36.** <sup>1</sup>H NMR spectra recorded (600 MHz, D<sub>2</sub>O, 298K) for compound **G2** (1.0 mM).

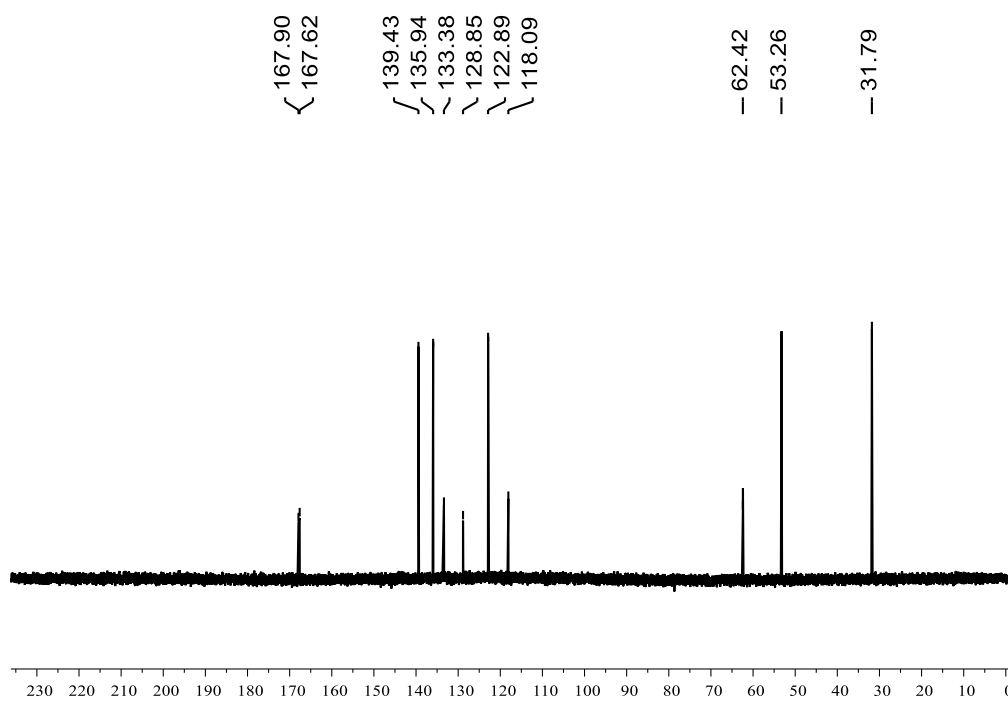

**Figure S37.** <sup>13</sup>C NMR spectra recorded (600 MHz, D<sub>2</sub>O, 298K) for compound **G3**.

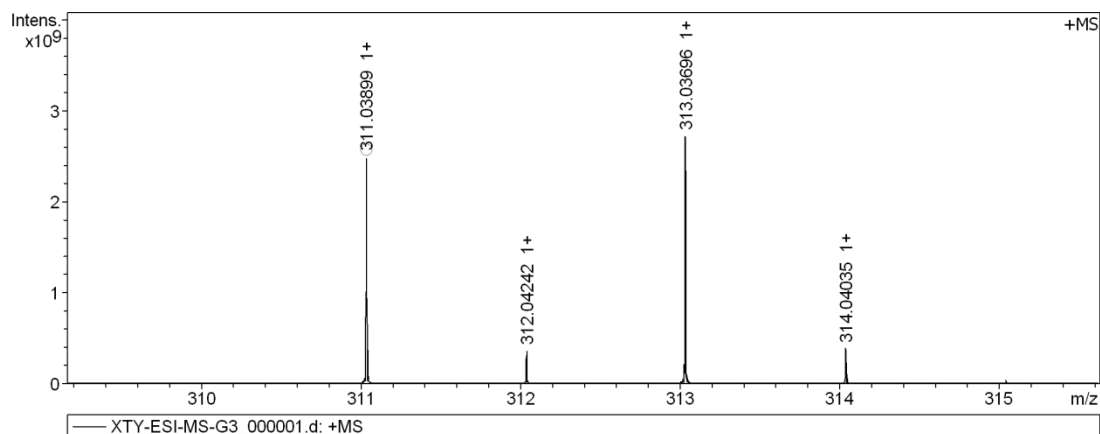

**Figure S38.** HRMS (ESI) spectrum of **G3**.

#### Reference

- 1 Day, A.; Arnold, A.P.; Blanch, R.J.; Snushall, B. Controlling factors in the synthesis of cucurbituril and its homologues. *J. Org. Chem.* **2001**, *66*, 8094–8100.
- 2 Yang, X.; Zhao, Z.; Zhang, X.; Liu, S. Probing guest compounds enabling the facile isolation of cucurbit[10]uril. *Sci. China. Chem.* **2018**, *61*, 787–791.
- 3 Guo, X.; Kim, F.S.; Jenekhe, S.A.; Watson, M.D. Phthalimide-based polymers for high performance organic thin-film transistors. *J. Am. Chem. Soc.* **2009**, *131*, 7206-7207.
- 4 Chen, D.; Zhao, Y.; Zhong, C.; Gao, S.; Yu, G.; Liu, Y.; Qin, J. Effect of polymer chain conformation on field-effect transistor performance: synthesis and properties of two arylene imide based D–A copolymers. *J. Mater. Chem.* **2012**, *22*, 14639.
